# Supplementary material
Source: Springer Nature journal article supplement (https://www.springermedizin.de/resource/supplementary/12875_2014_1057_MOESM2_ESM.pdf/9436062)

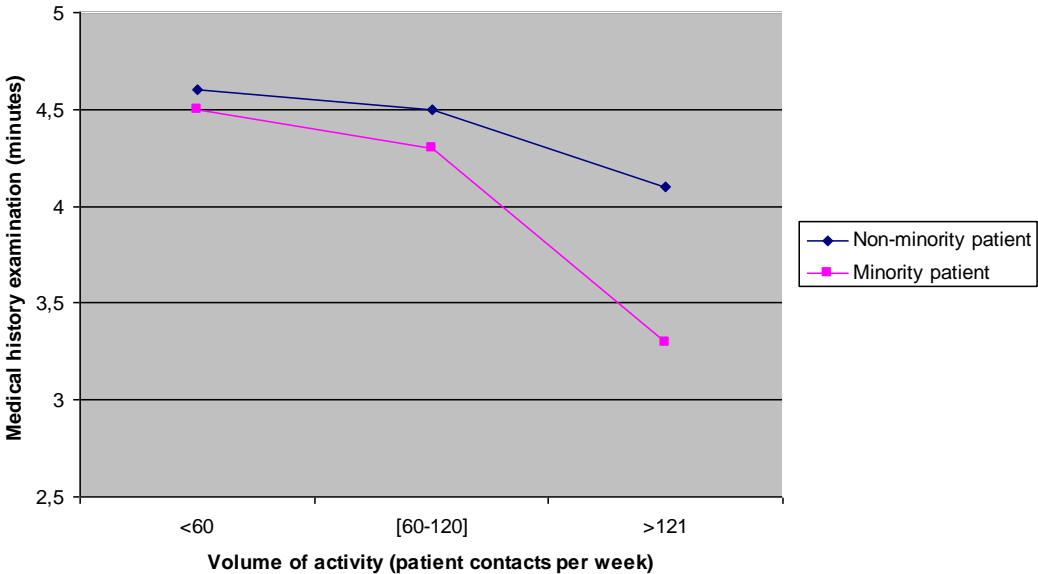

Supplement: MOESM2 [file 9436062]
